# Supplementary material for: Room-temperature bonding of glass chips via PTFE-assisted plasma modification for nanofluidic applications
Source: Royal Society of Chemistry journal article supplement (doi:10.1039/d3lc00169e), 2023-01-01
Supplement: d3lc00169e1.pdf [file d3lc00169e1.pdf]

# Room-temperature bonding of glass chips via PTFE-assisted plasma modification for nanofluidic applications

Qiushi Kang<sup>a</sup>, Chenxi Wang<sup>a\*</sup>, Kaimeng Liu<sup>a</sup>, Takehiko Kitamori<sup>b</sup>

<sup>a</sup> State Key Laboratory of Advanced Welding and Joining, Harbin Institute of Technology, Harbin 150001, China. Email: wangchenxi@hit.edu.cn

<sup>b</sup> Collaborative Research Organization for Micro and Nano Multifunctional Devices, The University of Tokyo, 7-3-1 Hongo, Bunkyo, Tokyo 113-8656, Japan.

\*Corresponding author: [wangchenxi@hit.edu.cn](mailto:wangchenxi@hit.edu.cn)

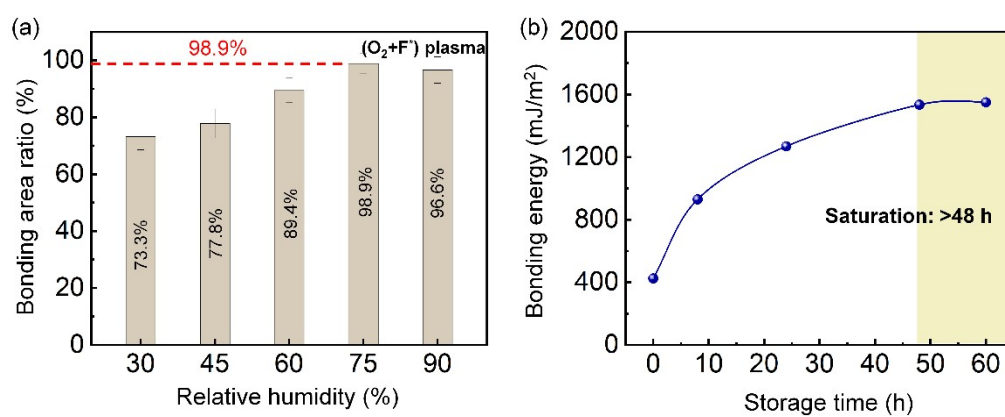

**Fig. S1.** (a) The characterization of bonding efficiency with different relative humidity.

(b) Room temperature bonding energy of glass-glass as a function of storage time in ambient air.

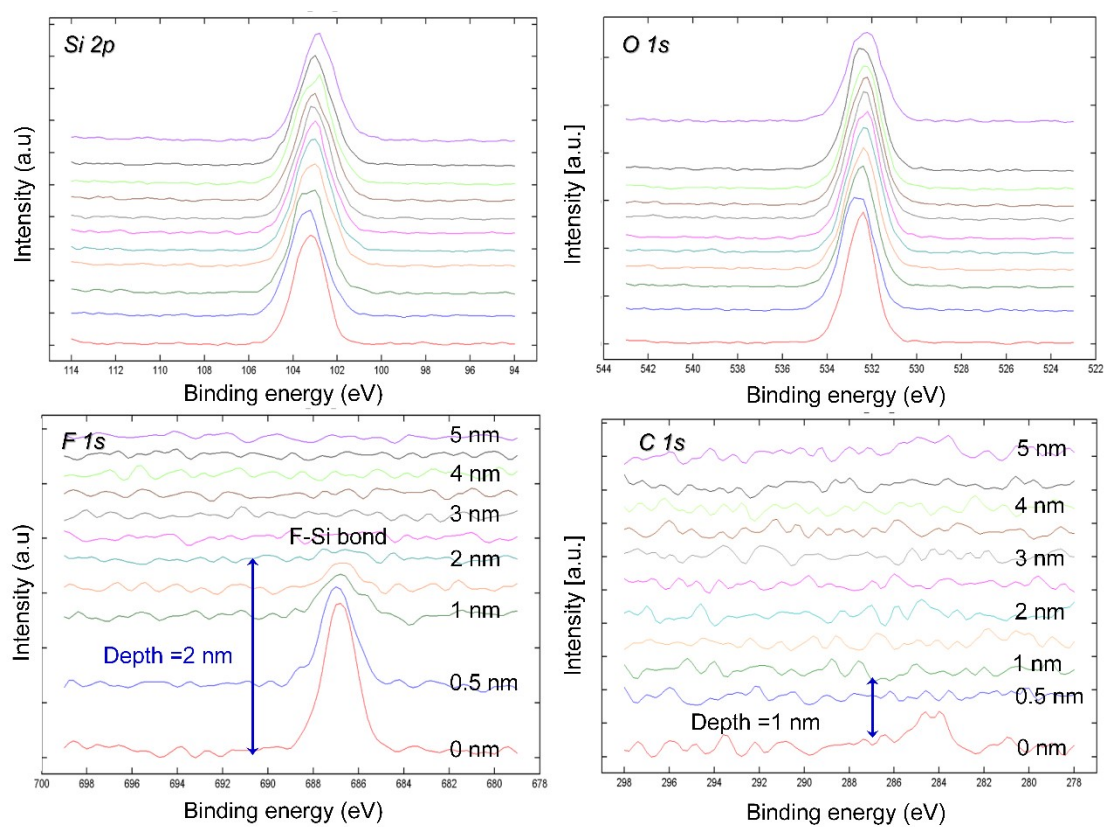

**Fig. S2.** The XPS compositional depth analysis of glass surface activated via  $(O_2 + F^*)$  plasma.

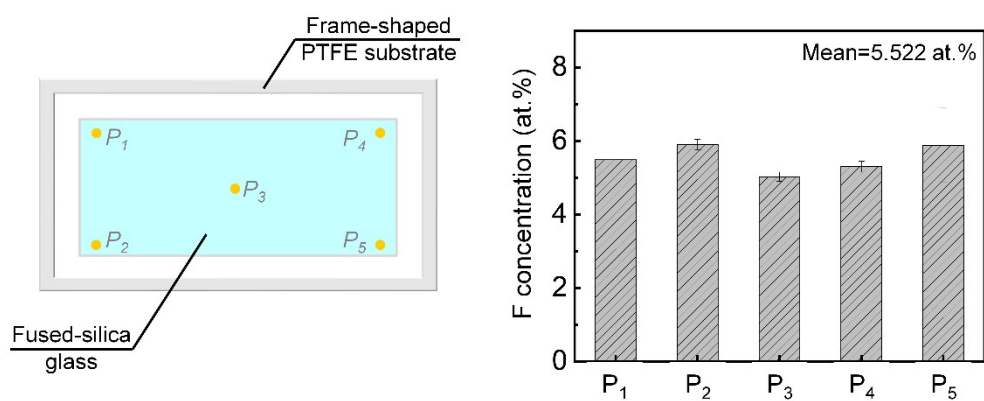

**Fig. S3.** (a) Schematic of five positions on the fused-silica glass surface for the XPS measurements and (b) the atomic concentrations (at.%) of fluorine at the corresponding positions after ( $\text{O}_2+\text{F}^*$ ) plasma treatment for 40 s.

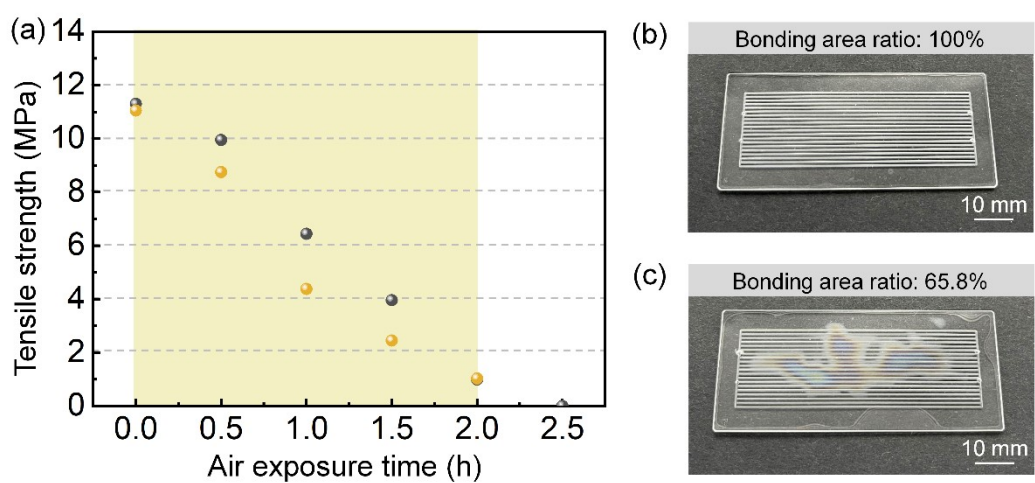

**Fig. S4.** (a) The evaluation of bondability of ( $\text{O}_2+\text{F}^*$ ) plasma activated surfaces with different air exposure times before bonding at RH=75% in the atmosphere. The photographs of the bonding area obtained with an air exposure time of 0 h and 1 h are shown in (b) and (c), respectively.
